# Supplementary material
Source: MDPI journal article supplement (https://www.mdpi.com/2076-3298/5/2/31)
Supplement: s1 [file s1]

## **S2: List of References for Charisma Categorisation**

### **Low level of charisma**

Atlantic whitefish [11]  
Black abalone [7]  
Black-faced spoonbill [16]  
Giant kokopu [24]  
Giant Palouse earthworm [7]  
Elkhorn coral [7]  
Pacific rockfish [23]  
Riverside fairy shrimp [29]  
Silvery minnow [7]  
Striped shiner [29]  
Water vole [33]

### **High level of charisma**

African forest elephant [21]  
Asian elephant [20]  
Atlantic salmon [18]  
Australian birds [5]  
Bald eagle [6]  
Beluga whale [17]  
Bornean orang-utan [10]  
Brown kiwi [15]  
Coho salmon [18]  
Giant Panda [9]  
Golden-shouldered parrot [27]  
Gray-blue whale [17]

Gray whale [17]  
Gray wolf [9]  
Harbour seal [17]  
Hawaiian monk seal [17]  
Hawksbill sea turtle [3]  
Humpback whale [17]  
Leadbeater's possum [22]  
Leatherback turtle [3]  
Loggerhead sea turtle [3]  
Mahogany glider [19]  
Manatee [17]  
Manchurian black bear [9]  
Maremma cattle breed [26]  
Marine turtle [3] Mediterranean monk seal [17]  
Mexican spotted owl [13]  
Modicana cattle breed [26]  
Mountain goral [8]  
North Atlantic right whale [17]  
North Pacific right whale [31]  
Northern hairy-nosed wombat [30]  
Northern spotted owl [13]  
Otter [4]  
Peregrine falcon [25]  
Porbeagle shark [12]  
Puget Sound Chinook salmon [18]  
Red-cockaded woodpecker [14]  
Sea otter [4]  
Smalltooth sawfish [28]  
Southern CA steelhead [2]

Southern resident killer whale [\[17\]](#)

Spotted seal [\[17\]](#)

Steller sea lion [\[17\]](#)

Upper Willamette River Chinook salmon [\[18\]](#)

Vietnamese rhinoceros [\[32\]](#)

Whale shark [\[12\]](#)

White-rumped vulture [\[9\]](#)

Whooping cranes [\[1\]](#)

## References

- [1] Bernacchi, L. A., C. J. Ragland, and T. R. Peterson (2015). Engaging active stakeholders in implementation of community-based conservation: Whooping crane management in Texas, USA. *Wildlife Society Bulletin* 39(3), 564–573.
- [2] Brown, R. L. (2005). Understanding Central Valley Chinook salmon and steelhead. *San Francisco Estuary and Watershed Science* 3(1).
- [3] Campbell, L. M. and C. Smith (2006). What makes them pay? Values of volunteer tourists working for sea turtle conservation. *Environmental management* 38(1), 84–98.
- [4] Chadès, I., J. M. Curtis, and T. G. Martin (2012). Setting realistic recovery targets for two interacting endangered species, sea otter and northern abalone. *Conservation Biology* 26(6), 1016–1025.
- [5] Curtis, L. K. (2012). *Queensland’s Threatened Animals*. CSIRO publishing.
- [6] Dawson, D. and J. F. Shogren (2001). An update on priorities and expenditures under the Endangered Species Act. *Land Economics* 77(4), 527–532.
- [7] Decker, K. A. and P. Watson (2017). Estimating willingness to pay for a threatened species within a threatened ecosystem. *Journal of Environmental Planning and Management* 60(8), 1347–1365.
- [8] Dinerstein, E., K. Varma, E. Wikramanayake, G. Powell, S. Lumpkin, R. Naidoo, M. Korchinsky, C. Del Valle, S. Lohani, J. Seidensticker, et al. (2013). Enhancing conservation, ecosystem services, and local livelihoods through a wildlife premium mechanism. *Conservation Biology* 27(1), 14–23.

- [9] Ducarme, F., G. M. Luque, and F. Courchamp (2013). What are "charismatic species" for conservation biologists. *BioSciences Master Reviews* 10(2013), 1–8.
- [10] Dudgeon, D. (2000). Riverine biodiversity in asia: a challenge for conservation biology. *Hydrobiologia* 418(1), 1–13.
- [11] Fisheries and Oceans Canada (2006). Recovery Strategy for the Atlantic Whitefish (*Coregonus huntsmani*) in Canada. Available online at: <https://manualzz.com/doc/18390952/atlantic-whitefish-recovery-strategy-for-the-atlantic-cor...>, last accessed 01/19/2018.
- [12] Guerra, A. S., D. J. Madigan, M. S. Love, and D. J. McCauley. The worth of giants: The consumptive and non-consumptive use value of the giant sea bass (*Stereolepis gigas*). *Aquatic Conservation: Marine and Freshwater Ecosystems*.
- [13] Higa, M., Y. Yamaura, M. Senzaki, I. Koizumi, T. Takenaka, Y. Masatomi, and K. Momose (2016). Scale dependency of two endangered charismatic species as biodiversity surrogates. *Biodiversity and conservation* 25(10), 1829–1841.
- [14] Home, R., C. Keller, P. Nagel, N. Bauer, and M. Hunziker (2009). Selection criteria for flagship species by conservation organizations. *Environmental Conservation* 36(2), 139–148.
- [15] Jay, M. (2005). Recent changes to conservation of New Zealand’s native biodiversity. *New Zealand Geographer* 61(2), 131–138.
- [16] Jin, J., Z. Wang, and X. Liu (2008). Valuing black-faced spoonbill conservation in Macao: a policy and contingent valuation study. *Ecological Economics* 68(1), 328–335.

- [17] Lew, D. K. (2015). Willingness to pay for threatened and endangered marine species: a review of the literature and prospects for policy use. *Frontiers in Marine Science* 2, 96.
- [18] Loomis, J. B. and D. S. White (1996). Economic benefits of rare and endangered species: summary and meta-analysis. *Ecological Economics* 18(3), 197–206.
- [19] Maclean, J. J. (2006). Reducing the impact of barbed wire on wildlife. *The Australasian Bat Society Newsletter*.
- [20] Ninan, K. and J. Sathyapalan (2005). The economics of biodiversity conservation: a study of a coffee growing region in the Western Ghats of India. *Ecological Economics* 55(1), 61–72.
- [21] Poufoun, J. N., J. Abildtrup, D. J. Sonwa, and P. Delacote (2016). The value of endangered forest elephants to local communities in a transboundary conservation landscape. *Ecological economics* 126, 70–86.
- [22] Rees, S. et al. (2014). A new national park. *Interaction* 42(4), 8.
- [23] Roff, J. (2013). *Marine conservation ecology*. Routledge.
- [24] R.T. Yao, J.A. Turner, R. S. C. M. and T. Barnard (2011). Supporting Threatened Species in Exotic Planted Forests: Would New Zealanders be willing to pay? Available online at: <https://fgr.nz/documents/download/5712>, last accessed 01/19/2018.
- [25] Savard, J.-P. L., P. Clergeau, and G. Mennechez (2000). Biodiversity concepts and urban ecosystems. *Landscape and urban planning* 48(3), 131–142.
- [26] SEQ Ecosystem Services Framework (2018). Iconic species. Available online at: <http://www.ecosystems-servicesseq.com.au/step-5-services/iconic-species>, last accessed 01/17/2018.

- [27] Snyder, N. F. (2000). *Parrots: status survey and conservation action plan 2000-2004*. IUCN.
- [28] Sobel, J. and C. Dahlgren (2004). *Marine reserves: a guide to science, design, and use*. Island Press.
- [29] Stanley, D. L. (2005). Local Perception of Public Goods: Recent Assessments of Willingness-to-pay for Endangered Species. *Contemporary Economic Policy* 23(2), 165–179.
- [30] Tisdell, C. and H. S. Nantha (2006). Comparison of funding and demand for the conservation of the charismatic koala with those for the critically endangered wombat *Lasiorninus krefftii*. In *Vertebrate Conservation and Biodiversity*, pp. 435–455. Springer.
- [31] Wallmo, K. and D. K. Lew (2012). Public willingness to pay for recovering and downlisting threatened and endangered marine species. *Conservation Biology* 26(5), 830–839.
- [32] Walpole, M. J. and N. Leader-Williams (2002). Tourism and flagship species in conservation. *Biodiversity & Conservation* 11(3), 543–547.
- [33] White, P. C., K. W. Gregory, P. J. Lindley, and G. Richards (1997). Economic values of threatened mammals in Britain: a case study of the otter *Lutra lutra* and the water vole *Arvicola terrestris*. *Biological Conservation* 82(3), 345–354.
